# Supplementary material for: Beta-Amylase and Phosphatidic Acid Involved in Recalcitrant Seed Germination of Chinese Chestnut
Source: Front Plant Sci. 2022 Mar 25;13:828270. doi: 10.3389/fpls.2022.828270 (PMC8990265; doi:10.3389/fpls.2022.828270)
Supplement: Supplementary file 6 [file Data_Sheet_6.XLSX]

## Sheet: Sheet1
Data Sheet 6 Selected SVs in genes known to control seed germination
Code	Gene name	Annotation	Function	Citation	V2 gene ID	N11_1 gene ID	SV ID	SV Type*
1	NB-ARC	NB-ARC domain-containing disease resistance protein (AT3G14470)	Disease resistance family protein	10.1105/tpc.016725	Cm03G01168	GWHPANWH014438	SV_100535	Deletion
2	NB-ARC				Cm03G01169	GWHPANWH014439	SV_34082	Deletion
3	R gene	LRR family protein (AT2G34930)	Disease resistance family protein	10.1111/j.1365-3040.2011.02390.x	Cm09G00141	GWHPANWH033490	SV_85269	Deletion
4	CIK4	Encodes one of a group of LRR-RLKs (AT5G45780)	Disease resistance family protein	10.1016/S1369-5266(03)00089-X	Cm02G01732	GWHPANWH007708	SV_22150	Deletion
5	R gene	Leucine-rich repeat protein (AT3G47570)	Disease resistance family protein	10.1016/S1369-5266(03)00089-X	Cm12G00383	GWHPANWH001901	SV_109294	Deletion
6	NB-ARC	NB-ARC domain (AT3G14470)	Disease resistance family protein	10.1105/tpc.016725	Cm12G01961	GWHPANWH011552	SV_113019	Deletion
7					Cm10G02154	GWHPANWH031186	SV_100537	Deletion
8	NB-ARC	NB-ARC domain-containing	Disease resistance family protein	10.1105/tpc.009308	Cm09G00363	GWHPANWH016786	SV_86320	Deletion
9	NB-ARC	NB-ARC domain Leucine rich repeat (AT4G27190)	Disease resistance family protein	10.3390/genes8100249	Cm08G00427	GWHPANWH028569	SV_78985	Deletion
10	R gene	TIR-NBS-LRR class (AT5G17680)	Disease resistance family protein	10.1007/s00122-014-2438-0	Cm05G00069	GWHPANWH018825	SV_52641	Insertion
11	NB-ARC	LRR and NB-ARC domains-containing disease resistance protein (AT3G14470)	Disease resistance family protein	10.1016/S1055-7903(03)00274-4	Cm03G01169	GWHPANWH014439	SV_34082	Deletion
12	NB-ARC	Disease resistance protein RGA2 (AT3G14470)	Disease resistance family protein	10.1105/tpc.016725	Cm03G02345	GWHPANWH015621	SV_39607	Insertion
13	NRG1.1	NB-ARC domain-containing ,CC-NBS-LRR class(AT5G66900)	Disease resistance family protein	10.1105/tpc.19.00118	Cm07G01638	GWHPANWH022408	SV_75204	Insertion
14	EDR1	ENHANCED DISEASE RESISTANCE 1 (AT1G08720)	resistance to powdery mildew disease caused by the fungus Erysiphe cichoracearum	10.1111/tpj.13599	Cm01G04415	GWHPANWH006098	SV_15189	Deletion
15	EDR2	ENHANCED DISEASE RESISTANCE protein (AT5G35180)	plant defense responses	10.1111/j.1365-313X.2005.02523.x	Cm01G00693	GWHPANWH002165	SV_2937	Insertion
16	AMY1.1	alpha-amylase activity (AT4G25000)	Involved in starch degradation by alpha-amylase activity	10.1146/annurev-cellbio-092910-154055.	Cm01G04225	GWHPANWH005848	SV_14543	Deletion
17	PIL5	Encodes a novel Myc-related bHLH transcription factor (AT2G20180)	It is a key negative regulator of phytochrome-mediated seed germination and acts by inhibiting chlorophyll biosynthesis	10.1105/tpc.108.058859	Cm09G00427	GWHPANWH033169	SV_86458	Insertion
18	SOM	Encodes SOMNUS (SOM), a nucleus-localized CCCH-type zinc finger protein(AT1G03790)	SOM negatively regulates light-dependent seed germination downstream of PIL5	10.1105/tpc.108.058859.	Cm05G01513	GWHPANWH020265	SV_56573	Deletion
19	RGA/GAI	Member of the VHIID/DELLA regulatory family (AT2G01570)	RGA1 binds to PIF3 and inhibits its DNA binding activity and thus affects the expression of PIF3 regulated genes.	10.1105/tpc.18.00825	Cm04G01643	GWHPANWH017213	SV_47891	Deletion
		DNA-binding transcription factor activity (AT1G14920)	Repressor of GA responses and involved in gibberellic acid mediated signaling	10.1105/tpc.18.00825
20	RVE1	Myb-like transcription factor (AT5G17300)	Seed Germination	10.1111/nph.16236	Cm01G01901	GWHPANWH003372	SV_6319	Deletion
21	DAG1	Zinc finger transcription factor (AT3G61850)	Seed Germination	10.1111/j.1365-313X.2009.04055.x	Cm05G00178	GWHPANWH018913	SV_53031	Deletion
22	ABA1	Encodes a single copy zeaxanthin epoxidase gene (AT5G67030)	Biosynthesis of the abiotic stress hormone abscisic acid	10.1046/j.1365-313x.2001.01185.x	Cm08G00652	GWHPANWH028326	SV_79619	Deletion
23	ABA2	Encodes a cytosolic short-chain dehydrogenase/reductase (AT1G52340)	Involved in the conversion of xanthoxin to ABA-aldehyde during ABA biosynthesis	10.1046/j.1365-313x.2001.01185.x	Cm03G02353	GWHPANWH015623	SV_39651	Deletion
24	AAO3	Encodes the aldehyde oxidase(AT2G27150)	AAO3 isoform catalyzing the final step in abscisic acid biosynthesis.	10.1105/tpc.108.058859	Cm07G01033	GWHPANWH023156	SV_73091	Insertion
25	NCED2/5	Encodes 9-cis-epoxycarotenoid dioxygenase (AT4G18350)	A key enzyme in the biosynthesis of abscisic acid	10.1104/pp.107.113738	Cm02G01456	GWHTANWH007989	SV_21054	Insertion
		Encodes 9-cis-epoxycarotenoid dioxygenase (AT1G30100)	A key enzyme in the biosynthesis of abscisic acid	10.1104/pp.109.137943
26	NCED3/9	Encodes 9-cis-epoxycarotenoid dioxygenase (AT3G14440)	A key enzyme in the biosynthesis of abscisic acid	10.1104/pp.18.01185	Cm03G00668	GWHPANWH013918	SV_32192	Deletion
		Encodes 9-cis-epoxycarotenoid dioxygenase (AT1G78390)	A key enzyme in the biosynthesis of abscisic acid	10.1046/j.1365-313X.2003.01786.x
27	NCED6	Encodes 9-cis-epoxycarotenoid dioxygenase (AT3G24220)	A key enzyme in the biosynthesis of abscisic acid	10.1073/pnas.1112151108	Cm08G01388	GWHPANWH027541	SV_81298	Deletion
28	CPS	ent-copalyl diphosphate synthase activity (AT4G02780)	Catalyzes the conversion of geranylgeranyl pyrophosphate (GGPP) to copalyl pyrophosphate (CPP) of gibberellin biosynthesis	10.1104/pp.122.2.415	Cm12G00905	GWHPANWH012379	SV_110939	Deletion
29	KS	ent-kaurene synthase activity (AT1G79460)	Encodes for a protein with ent-kaurene synthase B activity which catalyzes the second step in the cyclization of GGPP to ent-kaurene in the gibberellins biosynthetic pathway.	10.1104/pp.108.126375	Cm03G00126	GWHPANWH013401	SV_29161	Deletion
30	KO	Encodes a member of the CYP701A cytochrome p450 family (AT5G25900)	Involved in later steps of the gibberellin biosynthetic pathway	10.1104/pp.110.168252	Cm01G04131	GWHPANWH005760	SV_14174	Deletion
31	KAO	Encodes an ent-kaurenoic acid hydroxylase (AT1G05160)	Involved in the gibberellin biosynthetic pathway	10.1073/pnas.041588998	Cm03G02010	GWHPANWH015224	SV_37972	Deletion
		Encodes an ent-kaurenoic acid hydroxylase (AT2G32440)	Involved in the gibberellin biosynthetic pathway	10.1073/pnas.041588998
32	GA20ox1	Encodes gibberellin 20-oxidase that is involved in the later steps of the gibberellin biosynthetic pathway (AT4G25420)	Involved in the gibberellin biosynthetic pathway	10.1093/jxb/eraa128	Cm09G01563	GWHPANWH019204	SV_90564	Deletion
33	GA20ox2				Cm05G00440	GWHPANWH019204	SV_53963	Deletion
34	GA20ox3	Encodes a gibberellin 20-oxidaseAT5G07200 (AT5G07200)	Involved in the gibberellin biosynthetic pathway	10.1111/tpj.14542	Cm09G00978	GWHPANWH032630	SV_88649	Deletion
35	GA3ox1/ox2	Gibberellin 3-beta-dioxygenase activity (AT1G15550)	Involved in later steps of the gibberellin biosynthetic pathway	10.1016/j.molp.2016.02.009	Cm02G02456	GWHPANWH007048	SV_24835	Insertion
		Gibberellin 3-beta-dioxygenase activity (AT1G80340)	Involved in later steps of the gibberellin biosynthetic pathway	10.1016/j.molp.2016.02.009
36	GA3ox3	gibberellin 3-oxidase 3 (AT4G21690)	Involved in the gibberellin biosynthetic pathway	10.1105/tpc.018143	Cm01G00970	GWHPANWH002453	SV_3691	Deletion
37	GA3ox4	gibberellin 3-oxidase 3 (AT1G30040)	Involved in the gibberellin biosynthetic pathway	10.1105/tpc.018143	Cm02G01468	GWHPANWH007972	SV_21107	Deletion
38	GA2ox1	Encodes a gibberellin 2-oxidase that acts on C19 gibberellins (AT1G78440)	Involved in the gibberellin biosynthetic pathway	10.1105/tpc.108.058818	Cm03G00679	GWHPANWH013929	SV_32221	Deletion
39	GA2ox2	Encodes a gibberellin 2-oxidase that acts on C19 gibberellins (AT1G30040)	Involved in the gibberellin biosynthetic pathway	10.1073/pnas.1116325108	Cm02G01468	GWHPANWH007972	SV_21107	Deletion
		Encodes a gibberellin 2-oxidase that acts on C19 gibberellins (AT2G34555)	Involved in the gibberellin biosynthetic pathway	10.1111/j.1365-313X.2005.02465.x
40	GA2ox6	Encodes a gibberellin 2-oxidase that acts on C19 gibberellins (AT1G02400)	Involved in the gibberellin biosynthetic pathway	10.1105/tpc.108.058818	Cm12G00778	GWHPANWH012515	SV_110625	Deletion
41	GA2ox8	Encodes a gibberellin 2-oxidase that acts on C19 gibberellins (AT4G21200)	Involved in the gibberellin biosynthetic pathway	10.1105/tpc.108.058818	Cm02G00680	GWHPANWH008740	SV_18089	Deletion
42	BELL15	Encodes a BEL1-like homeobox gene that functions together with PNY in meristem maintenance by regulating the allocation process during vegetative and reproductive development (AT2G27990)	BELL15 improved accumulation of glucan and lignin, and it promoted secondary vascular growth by regulating the expression of genes relevant for cellulose synthases and lignin biosynthesis.	10.1186/s13068-020-01758-0	Cm07G01159	GWHPANWH023023	SV_73521	Deletion
43	DREB2A	ERF/AP2 transcription factor family	drought stress tolerance	10.1073/pnas.1704189114	Cm12G00431	GWHPANWH012954	SV_109408	Deletion
44	GATA5	GATA zinc finger	involved in regulating carbon and nitrogen metabolism	10.1111/j.1365-313X.2005.02588.x	Cm11G00780	GWHPANWH030576	SV_103526	Deletion
45	CHO1	Encodes a member of the AP2 family of transcriptional regulators (AT5G57390.1)	May be involved in germination and seedling growth	10.1007/s11103-010-9634-3	Cm01G00370	GWHPANWH001837	SV_1769	Deletion
46	NPF5.10	Major facilitator superfamily protein（AT1G22540）	nitrogen accumulation	10.1038/srep07962	Cm01G03087	GWHPANWH004702	SV_11231	Deletion
47	ICE1	INDUCER OF CBF EXPRESSION 1(AT3G26744)	Seed Germination	10.1105/tpc.18.00825	Cm01G01713	GWHPANWH003153	SV_5674	Insertion
48	BZIP21/TGA9	bZIP transcription factor family protein	Seed Germination	10.1104/pp.113.223511	Cm07G00713	GWHPANWH023496	SV_72038	Deletion
49	DOG1	Transcription factor HBP-1b(c1)	Seed Germination	10.1073/pnas.0911635107	Cm06G01612	GWHPANWH024950	SV_66917	Insertion
50	ABI5	a crucial regulator of abscisic acid (ABA) signaling pathways (AT2G36270)	Seed Germination	10.1105/tpc.18.00825	Cm11G01768	GWHTANWH029619	SV_105948	Deletion
51	ABI4	Encodes a member of the DREB subfamily A-3 of ERF/AP2 transcription factor family (ABI4)(AT2G40220)	Seed Germination	10.1007/s11103-020-00967-3	Cm05G01148	GWHTANWH019903	SV_55700	Insertion
52	ABI3	ABA INSENSITIVE 3 (AT3G24650)	Seed Germination	10.1105/tpc.18.00825	Cm09G00423	GWHTANWH033174	SV_86445	Deletion
53	ARF10	AUXIN RESPONSE FACTOR 10 (AT2G28350)	Seed Germination	10.3389/fpls.2016.00322	Cm07G01181	GWHTANWH022998	SV_73642	Insertion
54	ARF16	AUXIN RESPONSE FACTOR 16 (AT2G28350)	Seed Germination	10.1105/tpc.114.127993	Cm11G02117	GWHTANWH029321	SV_106930	Deletion
55					Cm05G00663	GWHTANWH019419	SV_54590	Insertion
56	BIN2	A member of the ATSK (shaggy-like kinase) family (AT4G18710)	Seed Germination	10.1105/tpc.114.130849	Cm02G01736	GWHTANWH007706	SV_22154	Deletion
57					Cm05G01363	GWHTANWH020097	SV_56179	Deletion
58	PKS5	Encodes a SOS2-like protein kinase (AT2G30360)	Seed Germination	10.1104/pp.114.255455	Cm07G01325	GWHTANWH022849	SV_74132	Insertion
59	CYP707A1	Encodes a protein with ABA 8'-hydroxylase activity, involved in ABA catabolism (AT4G19230)	Seed Germination	10.1371/journal.pgen.1003577	Cm12G00226	GWHTANWH013119	SV_108693	Insertion
60	CYP707A2	Encodes a protein with ABA 8'-hydroxylase activity, involved in ABA catabolism (AT2G29090)	Seed Germination	10.1371/journal.pgen.1003577	Cm07G01454	GWHTANWH022584	SV_74583	Insertion
61	NPF5.14/NRT1	Major facilitator superfamily protein（AT1G72120）	Nitrate Removal from the Xylem Sap and Mediates Cadmium Tolerance	10.1105/tpc.110.075242	Cm03G02619	GWHPANWH015885	SV_40742	Insertion
62	NPF6.2	Major facilitator superfamily protein（AT2G26690）	Nitrate Transporter Gene	10.3389/fpls.2016.00834.	Cm01G00883	GWHPANWH002362	SV_3507	Deletion
63	ZAT11	C2H2-type zinc finger (AT2G37430)	ZAT11 causes increased root growth and increased sensitivity to nickel ions	10.1007/s00299-014-1675-7	Cm11G02310	GWHPANWH029146	SV_107446	Insertion
64					Cm11G02306	GWHPANWH029154	SV_107432	Deletion
65	UBC7	ubiquitin conjugating enzyme E2 (AT5G59300)	Required in plant responses to multiple stress conditions	10.3390/plants9060723	Cm07G01553	GWHPANWH022485	SV_74879	Insertion
66	GEX1	Encodes a transmembrane domain (AT5G55490)	Gametophyte development and early embryogenesis	10.1111/j.1365-313X.2011.04713.x	Cm07G01555	GWHPANWH022480	SV_74882	Insertion
67	SEC14	Phosphoglyceride transfer family protein (AT3G46450)	Impacting pathogen response and cell cycle during geminivirus infection.	10.1104/pp.108.121038	Cm07G01557	GWHPANWH022479	SV_74885	Insertion
68	ACR9	Encodes a ACT domain-containing protein (AT2G39570)	The functions of these plant ACR proteins are largely unknown	10.1186/1471-2229-11-118	Cm07G01566	GWHPANWH022472	SV_74908	Deletion
69	BRO1	Endosomal targeting BRO1-like domain-containing protein (AT1G13310）	Dissecting salt stress pathways	10.1093/jxb/erj098	Cm07G02005	GWHPANWH021998	SV_76666	Deletion
70	AMY3	alpha-amylase activity (AT1G69830)	Involved in starch degradation by alpha-amylase activity	10.1146/annurev-cellbio-092910-154055.	Cm04G00467	GWHPANWH018428	SV_42962	Deletion
71	BMY4	beta-amylase activity (AT5G55700)	Involved in starch degradation by beta-amylase activity	10.1105/tpc.107.056507	Cm05G02882	GWHPANWH021563	SV_61103	Deletion
72	BMY7	beta-amylase activity (AT2G45880)	Involved in starch degradation by beta-amylase activity	10.1104/pp.106.079186	Cm05G00315	GWHPANWH019059	SV_53488	Deletion
73	GPAT2	sn-glycerol-3-phosphate 2-O-acyltransferase(AT1G02390)	GPAT enzyme responsible for plant membrane lipid and oil biosynthesis	10.1002/lipd.12049	Cm04G02521	GWHPANWH016330	SV_51669	Insertion
74	ATS1	Encodes a chloroplast glycerol-3-phosphate acyltransferase(AT1G32200)	Involved in the biosynthesis of chloroplast phosphatidylglycerol.	10.1104/pp.108.121335	Cm12G00122	GWHPANWH013182	SV_108385	Insertion
75	GPAT9.1	Glycerol-3-phosphate acyltransferase localized to the ER.(AT5G60620)	GPAT enzyme responsible for plant membrane lipid and oil biosynthesis	10.1002/lipd.12049	Cm10G02185	GWHPANWH009383	SV_100693	Deletion
76	LPAT3	LYSOPHOSPHATIDYL ACYLTRANSFERASE 3(AT1G51260)	Involved in the synthesis of phosphatidic acid	10.4161/psb.5.7.12101	Cm07G00306	GWHPANWH023890	SV_70863	Insertion
77	LPAT5	LYSOPHOSPHATIDYL ACYLTRANSFERASE 5(AT3G18850)	Involved in the synthesis of phosphatidic acid	10.1111/nph.16000	Cm10G01611	GWHPANWH009871	SV_99184	Deletion
